# Supplementary material for: Multistability in a family of DT–TTF organic radical based compounds (DT–TTF)4[M(L)2]3 (M = Au, Cu; L = pds, pdt, bdt)
Source: Royal Society of Chemistry journal article supplement (doi:10.1039/b505724h), 2005-01-01
Supplement: b505724h.pdf [file b505724h.pdf]

# Multistability in a family of DT-TTF organic radical based compounds (DT- TTF)<sub>4</sub>[M(L)<sub>2</sub>]<sub>3</sub> (M = Au, Cu; L = pds, pdt, bdt)

*João C. Dias, Xavi Ribas, Jorge Morgado, João Seiça, Elsa B. Lopes, Isabel C. Santos,  
Rui T. Henriques, Manuel Almeida, Klaus Wurst, Pascale Foury-Leylekian, Enric  
Canadell, José Vidal-Gancedo, Jaume Veciana, and Concepció Rovira*

**Table S1.** Short contact distances [Å] for (DT-TTF)<sub>4</sub>[Au(pds)<sub>2</sub>]<sub>3</sub> (**1**).

| Atoms                                                 | distance             | Atoms               | distance              |
|-------------------------------------------------------|----------------------|---------------------|-----------------------|
| <b>between [Au(pds)<sub>2</sub>] and DT-TTF units</b> |                      |                     |                       |
| Au1-S2 <sup>a</sup>                                   | 3.571(6)             | Au2-S3 <sup>c</sup> | 3.810(5)              |
| Au1-S7 <sup>b</sup>                                   | 3.401(6)             | Au2-S3 <sup>d</sup> | 3.810(5)              |
| Se1-S4 <sup>b</sup>                                   | 3.537(5)             | Se1-S1 <sup>b</sup> | 3.675(5)              |
| Se2-S11 <sup>a</sup>                                  | 3.535(6)             | Se2-S8 <sup>a</sup> | 3.678(6)              |
| Se3-S8 <sup>a</sup>                                   | 3.554(6)             | Se4-S1 <sup>b</sup> | 3.589(5)              |
| Se4-S4 <sup>c</sup>                                   | 3.691(5)             | Se5-S3 <sup>d</sup> | 3.589(5)              |
| <b>Between DT-TTF units.</b>                          |                      |                     |                       |
|                                                       | <b>intra tetrads</b> |                     | <b>inter tetrads</b>  |
| S1-S7 <sup>a</sup>                                    | 3.465(7)             | S1-S1               | 4.001(7) <sup>f</sup> |
| S2-S8 <sup>a</sup>                                    | 3.597(8)             | S1-S4               | 3.826(7) <sup>f</sup> |
| S4-S10 <sup>a</sup>                                   | 3.457(7)             | S2-S2               | 4.133(8) <sup>b</sup> |
| S5-S11 <sup>a</sup>                                   | 3.595(8)             | S2-S5               | 4.119(8) <sup>b</sup> |
| S7-S10 <sup>e</sup>                                   | 3.682(8)             |                     |                       |

Symmetry operations: <sup>a</sup>x,y,z; <sup>b</sup>-1+x,y,z; <sup>c</sup>1-x,-y,1-z; <sup>d</sup>-1+x,y,-1+z; <sup>e</sup>2-x,1-y,1-z; <sup>f</sup>2-x,-y,1-z;

**Table S2.** Selected bond distances [Å] in the transition metal complex for compounds **1**, **3-4**.

| Atoms                                                            | distance   | Atoms               | distance  |
|------------------------------------------------------------------|------------|---------------------|-----------|
| <b>(DT-TTF)<sub>4</sub>[Au(pds)<sub>2</sub>]<sub>3</sub> (1)</b> |            |                     |           |
| <b>AuSeComplex1</b>                                              |            |                     |           |
| Au1-Se1                                                          | 2.4153(19) | Se1-C1              | 1.866(18) |
| Au1-Se2                                                          | 2.4210(19) | Se2-C2              | 1.902(17) |
| Au1-Se3                                                          | 2.4354(19) | Se3-C6              | 1.872(16) |
| Au1-Se4                                                          | 2.425(2)   | Se4-C5              | 1.913(16) |
| C1-C2                                                            | 1.38(2)    | C5-C6               | 1.40(2)   |
| <b>AuSeComplex2</b>                                              |            |                     |           |
| Au2-Se5                                                          | 2.431(2)   | Se5-C10             | 1.913(16) |
| Au2-Se6                                                          | 2.427(3)   | Se6-C9              | 1.924(17) |
| C9-C10                                                           | 1.40(3)    |                     |           |
| <b>(DT-TTF)<sub>4</sub>[Cu(pds)<sub>2</sub>]<sub>3</sub> (3)</b> |            |                     |           |
| <b>CuSeComplex1</b>                                              |            | <b>CuSeComplex2</b> |           |
| Cu1-Se1                                                          | 2.292(2)   | Cu2-Se5             | 2.306(2)  |
| Cu1-Se2                                                          | 2.295(2)   | Cu2-Se6             | 2.302(2)  |
| Cu1-Se3                                                          | 2.296(2)   | Cu2-Se7             | 2.297(2)  |
| Cu1-Se4                                                          | 2.309(2)   | Cu2-Se8             | 2.294(2)  |
| Se1-C1                                                           | 1.920(15)  | Se5-C9              | 1.912(14) |
| Se2-C2                                                           | 1.894(13)  | Se6-C10             | 1.898(13) |
| Se3-C5                                                           | 1.900(13)  | Se7-C13             | 1.884(13) |
| Se4-C6                                                           | 1.889(14)  | Se8-C14             | 1.877(14) |
| C1-C2                                                            | 1.329(18)  | C9-C10              | 1.332(17) |
| C5-C6                                                            | 1.384(18)  | C13-C14             | 1.398(18) |
| <b>CuSeComplex3</b>                                              |            |                     |           |
| Cu3-Se9                                                          | 2.302(2)   | Se9-C17             | 1.892(15) |
| Cu3-Se10                                                         | 2.309(3)   | Se10-C18            | 1.924(15) |
| Cu3-Se11                                                         | 2.293(2)   | Se11-C21            | 1.892(14) |
| Cu3-Se12                                                         | 2.291(2)   | Se12-C22            | 1.817(16) |
| C17-C18                                                          | 1.339(18)  | C21-C22             | 1.413(19) |
| <b>(DT-TTF)<sub>4</sub>[Cu(pdt)<sub>2</sub>]<sub>3</sub> (4)</b> |            |                     |           |
| <b>CuSComplex1</b>                                               |            | <b>CuSComplex2</b>  |           |
| Cu1-S25                                                          | 2.180(2)   | Cu2-S29             | 2.197(2)  |
| Cu1-S26                                                          | 2.181(2)   | Cu2-S30             | 2.183(2)  |
| Cu1-S27                                                          | 2.181(2)   | Cu2-S31             | 2.187(2)  |
| Cu1-S28                                                          | 2.188(2)   | Cu2-S32             | 2.179(2)  |
| S25-C1                                                           | 1.738(8)   | S29-C9              | 1.754(7)  |
| S26-C2                                                           | 1.751(7)   | S30-C10             | 1.732(7)  |
| S27-C5                                                           | 1.734(8)   | S31-C13             | 1.734(8)  |

---

|        |           |         |           |
|--------|-----------|---------|-----------|
| S28-C6 | 1.756(8)  | S32-C14 | 1.731(7)  |
| C1-C2  | 1.385(10) | C9-C10  | 1.380(10) |
| C5-C6  | 1.415(10) | C13-C14 | 1.403(10) |

**CuSComplex3**

|         |           |         |           |
|---------|-----------|---------|-----------|
| Cu3-S33 | 2.180(2)  | S33-C17 | 1.749(8)  |
| Cu3-S34 | 2.191(2)  | S34-C18 | 1.742(9)  |
| Cu3-S35 | 2.180(2)  | S35-C21 | 1.753(9)  |
| Cu3-S36 | 2.175(2)  | S36-C22 | 1.729(10) |
| C17-C18 | 1.418(11) | C21-C22 | 1.435(12) |

---

**Table S3.** Short contact distances [Å] for (DT-TTF)<sub>4</sub>[Cu(pds)<sub>2</sub>]<sub>3</sub> (**3**).

| Atoms                                               | distance | Atoms                         | distance |
|-----------------------------------------------------|----------|-------------------------------|----------|
| <b>Between Cu(pds)<sub>2</sub> and DT-TTF units</b> |          |                               |          |
| <b>DT1-CuSeComplex1</b>                             |          | <b>DT3-CuSeComplex2</b>       |          |
| S6-Cu1 <sup>*</sup>                                 | 3.558    | S13-Cu2                       | 3.378    |
| S1-Se1                                              | 3.531    | S13-Se5                       | 3.926    |
| S4-Se1                                              | 3.632    | S13-Se7                       | 3.859    |
| S4-Se3                                              | 3.458    | S16-Se7                       | 3.918    |
| S3-Se1 <sup>*</sup>                                 | 3.884    | S15-Se5 <sup>*</sup>          | 3.508    |
| S6-Se1 <sup>*</sup>                                 | 3.836    | S15-Se7 <sup>*</sup>          | 3.562    |
| S6-Se3 <sup>*</sup>                                 | 3.904    | S18-Se7 <sup>*</sup>          | 3.493    |
| S-Se <sub>average</sub>                             | 3.708    | S-Se <sub>average</sub>       | 3.711    |
| <b>DT1-CuSeComplex2</b>                             |          | <b>DT4-CuSeComplex2</b>       |          |
| S1-Se6                                              | 3.624    | S19-Se6                       | 3.503    |
| S3-Se6                                              | 3.878    | S19-Se8                       | 3.635    |
| S4-Se8                                              | 3.669    | S22-Se8                       | 3.542    |
| S6-Se8                                              | 3.891    | S21-Se6 <sup>*</sup>          | 3.810    |
| S-Se <sub>average</sub>                             | 3.766    | S24-Se8 <sup>*</sup>          | 3.832    |
|                                                     |          | S-Se <sub>average</sub>       | 3.664    |
|                                                     |          | S21-Cu2 <sup>*</sup>          | 3.441    |
| <b>DT1-CuSeComplex3</b>                             |          | <b>DT4-CuSeComplex3</b>       |          |
| S5-Cu3                                              | 3.628    | S20-Cu3                       | 3.8420   |
| S5-Se9                                              | 3.743    | S20-Se11                      | 3.651    |
| S5-Se10                                             | 3.683    | S20-Se12                      | 3.769    |
| S2-Se9 <sup>*</sup>                                 | 3.720    | S23-Se11 <sup>*</sup>         | 3.905    |
| S-Se <sub>average</sub>                             | 3.715    | S23-Se12 <sup>**</sup>        | 3.661    |
| <b>DT2-CuSeComplex1</b>                             |          | S-Se <sub>average</sub> 3.747 |          |
| S10-Cu1                                             | 3.312    | <b>DT4-CuSeComplex1</b>       |          |
| S7-Se2                                              | 3.877    | S19-Se1                       | 3.810    |
| S10-Se2                                             | 3.868    | S21-Se1                       | 3.721    |
| S10-Se4                                             | 3.935    | S22-Se3                       | 3.740    |
| S9-Se2 <sup>*</sup>                                 | 3.524    | S24-Se3                       | 3.744    |
| S12-Se2 <sup>*</sup>                                | 3.575    | S-Se <sub>average</sub>       | 3.754    |
| S12-Se4 <sup>*</sup>                                | 3.462    |                               |          |
| S-Se <sub>average</sub>                             | 3.707    |                               |          |

**Between DT-TTF units.**

| <b>intra tetrads (DT1-DT2)</b> |       | <b>intra tetrads (DT3-DT4)</b> |       |
|--------------------------------|-------|--------------------------------|-------|
| S1-S7 <sup>a</sup>             | 3.378 | S13-S19                        | 3.752 |
| S2-S8 <sup>a</sup>             | 3.799 | S14-S20                        | 3.892 |
| S3-S9 <sup>e</sup>             | 3.489 | S15-S19                        | 3.794 |
| S4-S10 <sup>a</sup>            | 3.386 | S15-S21                        | 3.599 |
| S5-S11 <sup>a</sup>            | 3.825 | S16-S22                        | 3.728 |
| S6-S12                         | 3.516 | S17-S23                        | 3.783 |
| S-S <sub>average</sub>         | 3.566 | S18-S24                        | 3.582 |
|                                |       | S-S <sub>average</sub>         | 3.733 |

  

| <b>intra tetrads (DT2-DT3)</b> |       | <b>inter tetrads (DT4-DT1*)</b> |       |
|--------------------------------|-------|---------------------------------|-------|
| S7-S13                         | 3.783 | S24-S6                          | 3.907 |
| S7-S15                         | 3.744 | S21-S3                          | 3.943 |
| S8-S14                         | 3.894 |                                 |       |
| S9-S15                         | 3.795 | S22-S4                          | 3.803 |
| S10-S16                        | 3.768 | S19-S1                          | 3.808 |
| S10-S18                        | 3.747 |                                 |       |
| S11-S17                        | 3.859 |                                 |       |
| S12-S18                        | 3.768 |                                 |       |
| S-S <sub>average</sub>         | 3.795 |                                 |       |

---

Symmetry operations: <sup>a</sup>x,y,z; <sup>b</sup>-1+x,y,z; <sup>c</sup>1-x,-y,1-z; <sup>d</sup>-1+x,y,-1+z; <sup>e</sup>2-x,1-y,1-z; <sup>f</sup>2-x,-y,1-z;

**Table S4.** Short contact distances [ $\text{\AA}$ ] for  $(\text{DT-TTF})_4[\text{Cu}(\text{pdt})_2]_3$  (**4**).

| Atoms                                                                | distance | Atoms                        | distance |
|----------------------------------------------------------------------|----------|------------------------------|----------|
| <b>Between <math>\text{Cu}(\text{pdt})_2</math> and DT-TTF units</b> |          |                              |          |
| <b>DT1-CuSComplex1</b>                                               |          | <b>DT3-CuSComplex2</b>       |          |
| S6-Cu1*                                                              | 3.498    | S13-Cu2                      | 3.373    |
| S1-S25                                                               | 3.486    | S13-S29                      | 3.840    |
| S4-S25                                                               | 3.543    | S13-S31                      | 3.752    |
| S4-S27                                                               | 3.366    | S16-S31                      | 3.878    |
| S3-S25*                                                              | 3.838    | S15-S29*                     | 3.413    |
| S6-S25*                                                              | 3.794    | S15-S31*                     | 3.496    |
| S6-S27*                                                              | 3.803    | S18-S31*                     | 3.482    |
| S-S <sub>average</sub>                                               | 3.638    | S-S <sub>average</sub>       | 3.644    |
| <b>DT1-CuSComplex2</b>                                               |          | <b>DT4-CuSComplex2</b>       |          |
| S1-S30                                                               | 3.601    | S19-S30                      | 3.427    |
| S3-S30                                                               | 3.849    | S19-S32                      | 3.570    |
| S4-S32                                                               | 3.648    | S22-S32                      | 3.525    |
| S6-S32                                                               | 3.850    | S21-S30*                     | 3.707    |
| S-S <sub>average</sub>                                               | 3.737    | S24-S32*                     | 3.777    |
|                                                                      |          | S-S <sub>average</sub>       | 3.601    |
|                                                                      |          | S21-Cu2*                     | 3.431    |
| <b>DT1-CuSComplex3</b>                                               |          | <b>DT4-CuSComplex3</b>       |          |
| S5-Cu3                                                               | 3.569    | S20-Cu3                      | 3.728    |
| S5-S33                                                               | 3.678    | S20-S35                      | 3.583    |
| S5-S34                                                               | 3.613    | S20-S36                      | 3.700    |
| S2-S33*                                                              | 3.634    | S23-S35*                     | 3.882    |
| S-S <sub>average</sub>                                               | 3.642    | S23-S36**                    | 3.579    |
| <b>DT2-CuSComplex1</b>                                               |          | S-S <sub>average</sub> 3.687 |          |
| S10-Cu1                                                              | 3.275    | <b>DT4-CuSComplex1</b>       |          |
| S7-S26                                                               | 3.884    | S19-S25                      | 3.805    |
| S10-S26                                                              | 3.802    | S21-S25                      | 3.664    |
| S10-S28                                                              | 3.853    | S22-S27                      | 3.739    |
| S9-S26*                                                              | 3.460    | S24-S27                      | 3.682    |
| S12-S26*                                                             | 3.465    | S-S <sub>average</sub>       | 3.723    |
| S12-S28*                                                             | 3.368    |                              |          |
| S-S <sub>average</sub>                                               | 3.639    |                              |          |

**Between DT-TTF units.**

| <b>intra tetrads (DT1-DT2)</b> |       | <b>intra tetrads (DT3-DT4)</b>  |       |
|--------------------------------|-------|---------------------------------|-------|
| S1-S7 <sup>a</sup>             | 3.351 | S13-S19                         | 3.785 |
| S2-S8 <sup>a</sup>             | 3.776 | S14-S20                         | 3.863 |
| S3-S9 <sup>e</sup>             | 3.508 | S15-S19                         | 3.793 |
| S4-S10 <sup>a</sup>            | 3.364 | S15-S21                         | 3.585 |
| S5-S11 <sup>a</sup>            | 3.784 | S16-S22                         | 3.757 |
| S6-S12                         | 3.531 | S17-S23                         | 3.738 |
| S-S <sub>average</sub>         | 3.552 | S18-S24                         | 3.566 |
|                                |       | S-S <sub>average</sub>          | 3.727 |
| <b>intra tetrads (DT2-DT3)</b> |       | <b>inter tetrads (DT4-DT1*)</b> |       |
| S7-S13                         | 3.736 | S24-S6                          | 3.790 |
| S7-S15                         | 3.721 | S21-S3                          | 3.827 |
| S8-S14                         | 3.868 | S22-S4                          | 3.685 |
| S9-S15                         | 3.745 | S19-S1                          | 3.679 |
| S10-S16                        | 3.702 |                                 |       |
| S10-S18                        | 3.724 |                                 |       |
| S11-S17                        | 3.807 |                                 |       |
| S12-S18                        | 3.724 |                                 |       |
| S-S <sub>average</sub>         | 3.753 |                                 |       |

---

Symmetry operations: <sup>a</sup>x,y,z; <sup>b</sup>-1+x,y,z; <sup>c</sup>1-x,-y,1-z; <sup>d</sup>-1+x,y,-1+z; <sup>e</sup>2-x,1-y,1-z; <sup>f</sup>2-x,-y,1-z;



### **Structural description of compound DT-TTF(Cu(pdt)<sub>2</sub>) (5)**

Compound **5** crystallizes as dark-pink shining plates and was obtained under the same conditions as **4**, and usually each crystallization batch yielded a mixture of both. It crystallizes in the monoclinic system, space group  $P2_1/n$  ( $T = 233$  K), with an asymmetric unit containing one independent DT-TTF unit and one  $\text{Cu(pdt)}_2$  molecule in general positions (see Figure S1). This 1:1 stoichiometric salt is characterized by the dimerization of both the DT-TTF units and the  $\text{Cu(pdt)}_2$  units, in such a way that alternated layers of anions and cations are formed along  $b$  axis. The dimers alternate along  $a$  axis, allowing the formation chains of alternate dimers of anions and cations (see Figure S2). At the same time, each of these chains is surrounded by two parallel and four orthogonal chains, in a very similar way as the molecular packing found for neutral BEDT-TTF and ETEDT-TTF molecules.<sup>1,2</sup> Each DT-TTF molecule supports one positive charge, which is in line with the longer central C=C distance of 1.387(9) Å.<sup>3d,4</sup> The dimerization of the DT-TTF units and also of the  $\text{Cu(pdt)}_2$  units is very strong, with interplanar distances of 3.519 Å and 3.589 Å, respectively. Indeed, four short S⋯S contacts exist between 3.40-3.42 Å in the perfectly overlapped DT-TTF dimers, whereas for the  $\text{Cu(pdt)}_2$  dimers, the S⋯S contact are above 3.9 Å due to the lateral offset values of ca. 1.3 Å for the long axis of the skewed complexes. The chains are formed through short interdimer S⋯S contacts ranging between 3.38 and 3.61 Å. Finally, parallel chains are connected by aromatic  $\pi$ -stacking between the dithiophene rings of the DT-TTF and also between the pyrazine rings of the complexes. Only minor contacts are observed between perpendicular chains, i.e. one S⋯S contact of 3.64 Å between perpendicular DT-TTF dimers, and C-H⋯ $\pi$  interactions between perpendicular complex dimers.

**Figure S1.** ORTEP for compound DT-TTF(Cu(pdt)<sub>2</sub>) (**5**).

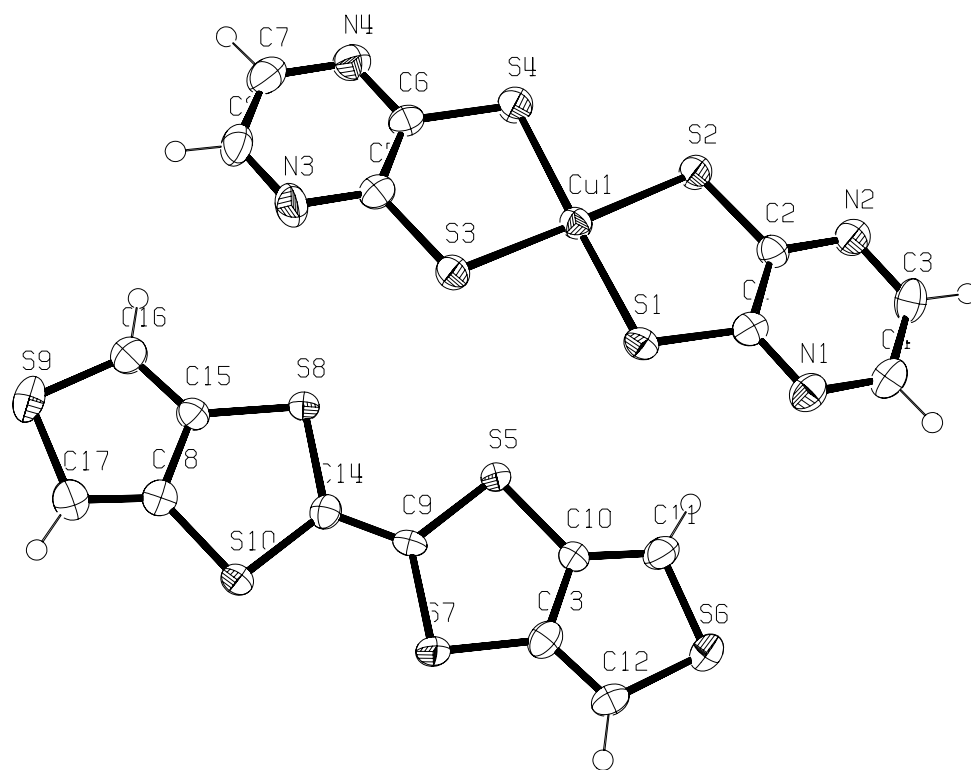

**Figure S2.** Crystal structure of (DT-TTF)[Cu(pdt)<sub>2</sub>] (**5**). a) View of the dimerized DT-TTF molecules layer along the *a* axis, b) in a perpendicular view to the *a* axis of the dimerized chain, and c) a side view of the dimers enlarging the chain through S⋯S contacts (dotted lines) along *a*.

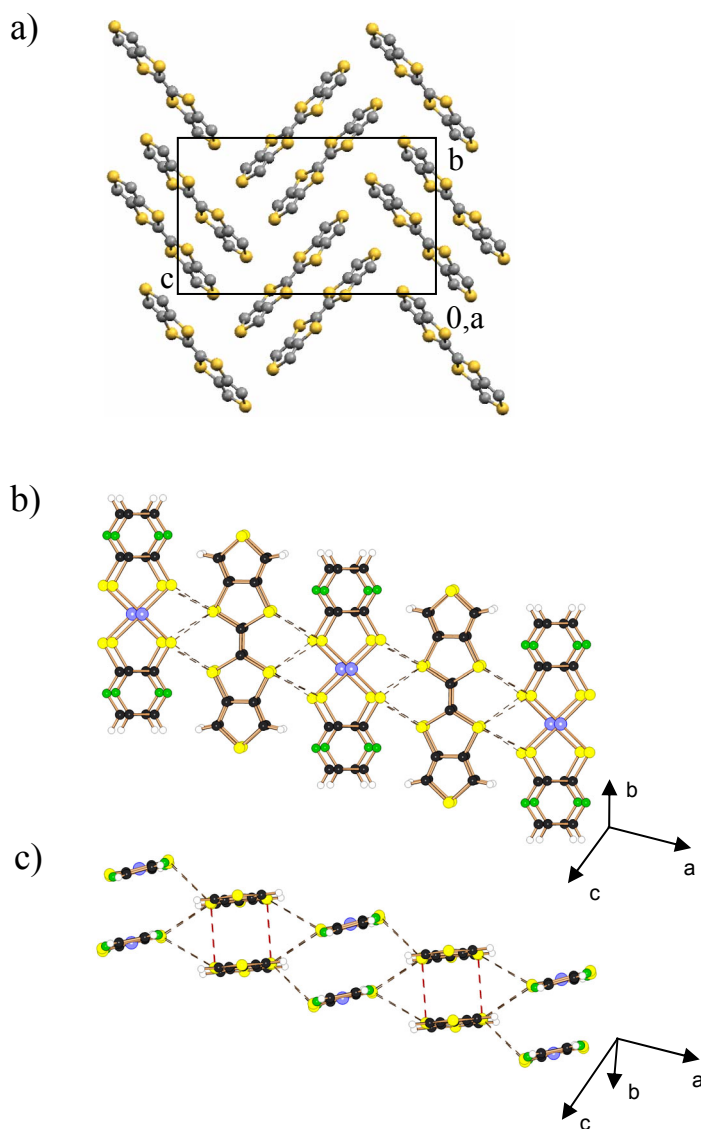

**EPR studies on oriented single crystals at different temperatures**

**DT<sub>4</sub>[Au(pds)<sub>2</sub>]<sub>3</sub> (1)**

Indexation: *a* (the shortest axis in cell) = *i* (the longest axis in the crystal); *b* = *k* (the shortest in crystal); and *c* (the longest in cell) = *j*

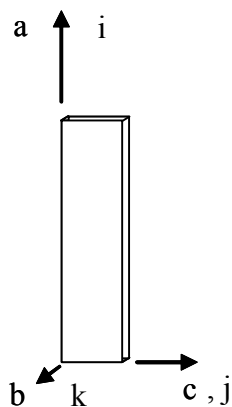

| <b>DT<sub>4</sub>(Au(pds)<sub>2</sub>)<sub>3</sub></b> | <b>300 K</b>  | <b>200 K</b>  | <b>135 K</b>  |
|--------------------------------------------------------|---------------|---------------|---------------|
| <b>g max (AHpp (G))</b><br><b>i; H//j</b>              | 2.0092 (20.2) | 2.0087 (35.6) | 2.0082 (71)   |
| <b>g med (AHpp(G))</b><br><b>j; H//i</b>               | 2.0052 (15.9) | 2.0055 (23.2) | 2.0060 (37.9) |
| <b>g min (AHpp(G))</b><br><b>i; H//k</b>               | 2.0006 (16.7) | 2.0008 (25.7) | 2.0014 (48)   |

**DT<sub>4</sub>[Au(bdt)<sub>2</sub>]<sub>3</sub> (2)**

Indexation: a (the shortest in cell) = i (the longest axis in the crystal); b = k (the shortest in crystal); and c (the longest in cell) = j

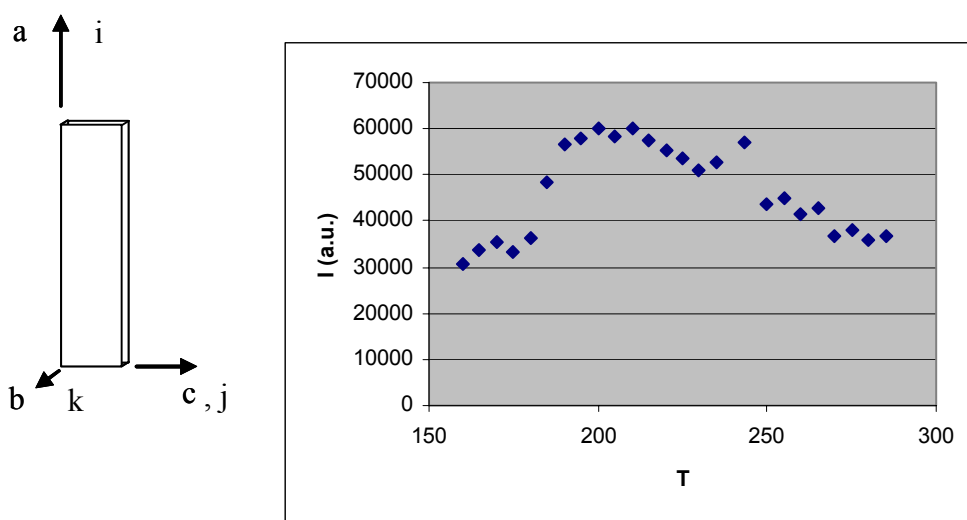

**Figure S3.** EPR intensity vs T plot for a single crystal of (DT-TTF)<sub>4</sub>[Au(bdt)<sub>2</sub>]<sub>3</sub> (2) oriented with the long macroscopic axis (i) perpendicular to the magnetic field H.

| <b>DT<sub>4</sub>(Au(bdt)<sub>2</sub>)<sub>3</sub></b> | <b>300 K</b>  |
|--------------------------------------------------------|---------------|
| <b>g max (AHpp (G))</b><br><b>i; H//j</b>              | 2.0089 (16.2) |
| <b>g med (AHpp(G))</b><br><b>j; H//i</b>               | 2.0040 (20)   |
| <b>g min (AHpp(G))</b><br><b>i; H//k</b>               | 1.9998 (14.4) |

**(DT-TTF)<sub>4</sub>[Cu(pds)<sub>2</sub>]<sub>3</sub> (3)**

Indexation: *a* (the longest in cell) = *j*; *b* (the shortest in cell) = *i* (the longest in crystal); and *c* = *k* (the shortest in crystal)

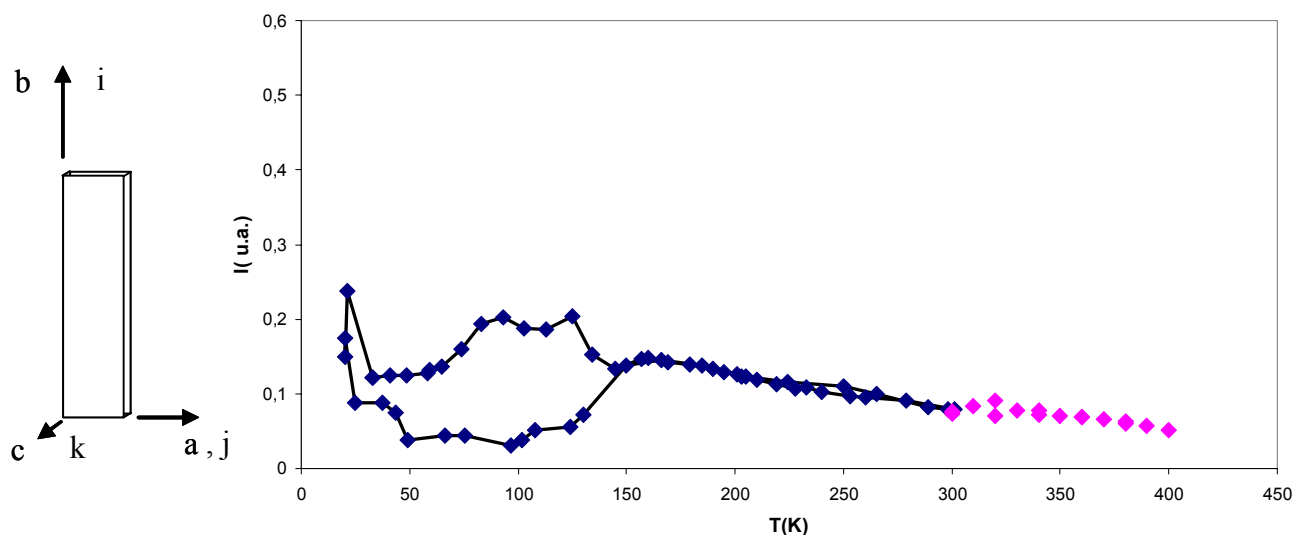

**Figure S4.** EPR intensity vs T plot for a single crystal of (DT-TTF)<sub>4</sub>[Cu(pds)<sub>2</sub>]<sub>3</sub> (3) oriented with the long macroscopic axis (*i*) perpendicular to the magnetic field *H*.

| <b>DT<sub>4</sub>(Cu(pds)<sub>2</sub>)<sub>3</sub></b> | <b>300 K</b>  | <b>122 K</b>  |
|--------------------------------------------------------|---------------|---------------|
| <b>g max (AHpp (G))</b><br><b>i; H//j</b>              | 2.0112 (15.3) | 2.0101 (5.43) |
| <b>g med (AHpp(G))</b><br><b>j; H//i</b>               | 2.0068 (9.72) | 2.0075 (3.6)  |
| <b>g min (AHpp(G))</b><br><b>i; H//k</b>               | 2.00020 (10)  | 2.0020 (4.0)  |

**DT<sub>4</sub>[Cu(pdt)<sub>2</sub>]<sub>3</sub> (4)**

Indexation: a (the longest in cell) = j; b (the shortest in cell) = i (the longest in crystal); and c = k (the shortest in crystal)

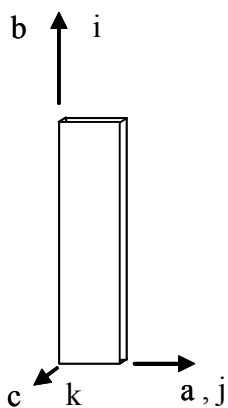

| <b>DT<sub>4</sub>(Cu(pdt)<sub>2</sub>)<sub>3</sub></b> | <b>300 K</b>   | <b>160 K</b>  |
|--------------------------------------------------------|----------------|---------------|
| <b>g max (AHpp (G))</b><br><b>i; H/j</b>               | 2.0123 (1.52)  | 2.0121 (0.97) |
| <b>g med (AHpp(G))</b><br><b>j; H/i</b>                | 2.0061 (1.20)  | 2.0062 (0.69) |
| <b>g min (AHpp(G))</b><br><b>i; H/k</b>                | 2.00015 (1.17) | 2.0015 (0.77) |

<sup>1</sup> Mas-Torrent, M.; Hadley, P.; Bromley, S. T.; Ribas, X.; Tarrés, J.; Mas, M.; Molins, E.; Veciana, J.; Rovira, C. *J. Am. Chem. Soc.* **2004**, *126*, 8546-8563.

<sup>2</sup> (a) Kobayashi, H.; Kobayashi, A.; Sasaki, Y.; Saito, G.; Inokuchi, H. *Bull. Chem. Soc. Jpn.* **1986**, *59*, 301. (b) Novoa, J. J.; Rovira, M. C.; Rovira, C.; Veciana, J.; Tarrés, J. *Adv. Mater.* **1995**, *7*, 233-237.

<sup>3</sup> a) Rovira, C.; Veciana, J.; Ribera, E.; Tarres, J.; Canadell, E.; Rousseau, R.; Mas, M.; Molins, E.; Almeida, M.; Henriques, R. T.; Morgado, J.; Schoeffel, J.-P.; Pouget, J.-P. *Angew. Chem. Int. Ed. Engl.* **1997**, *36*, 2324 ; b) Rovira, C. *Chem. Eur. J.* **2000**, *6*, 1723-1729; c) Ribera, E.; Rovira, C.; Veciana, J.; Tarrés, J.; Canadell, E.; Rousseau, R.; Molins, E.; Mas, M.; Schoeffel, J.-P.; Pouget, J.-P.; Morgado, J.; Henriques, R. T.; Almeida, M. *Chem. Eur. J.* **1999**, *5*, 2025-2039; d) Ribas, X.; Mas-Torrent, M.; Pérez-Benítez, A.; Dias, J. C.; Alves, H.; Lopes, E. B.; Henriques, R. T.; Molins, E.; Santos, I. C.; Wurst, K.; Foury-Leylekian, P.; Almeida, M. Veciana, J.; Rovira, C., *Adv. Funct. Mater.*, in press.

<sup>4</sup> Ribas, X.; Mas-Torrent, M.; Rovira, C.; Veciana, J.; Dias, J. C.; Alves, H.; Lopes, E. B.; Almeida, M.; Wurst, K. *Polyhedron* **2003**, *22*, 2415-2422.
